# Supplementary material for: Genome-Wide Identification and Characterization of the Msr Gene Family in Alfalfa under Abiotic Stress
Source: Int J Mol Sci. 2023 Jun 1;24(11):9638. doi: 10.3390/ijms24119638 (PMC10253413; doi:10.3390/ijms24119638)
Supplement: Supplementary file 1 [file ijms-24-09638-s001.zip › ijms-2370858-Tables S1-S9.xlsx]

## Sheet: Sheet1
Table S1. The Msr genes used in the study
Medicago sativa		Glycine max		Arabidopsis thaliana		Medicago truncatula
MsMsrA1	MS.gene038415.t1	GmMsrA2	Glyma.02G290800	AtMsrA1	At5g61640	MtMsrA1	Medtr5g092680.1
MsMsrA2	MS.gene027087.t1	GmMsrA3	Glyma.18G097000	AtMsrA2	At5g07460	MtMsrA2	Medtr3g051460.4
MsMsrA3	MS.gene29083.t1	GmMsrA4	Glyma.04G190800	AtMsrA3	At5g07470	MtMsrA3	Medtr3g075380.1
MsMsrA4	MS.gene017180.t1	GmMsrA5	Glyma.02G049400	AtMsrA4	At4g25130	MtMsrA4	Medtr8g076060.1
MsMsrA5	MS.gene012096.t1	GmMsrB1	Glyma.08G236000	AtMsrA5	At2g18030	MtMsrB1	Medtr8g461030.1
MsMsrA6	MS.gene44259.t1	GmMsrB2	Glyma.15G061100	AtGMsrB1	At1g53670	MtMsrB2	Medtr2g020900.1
MsMsrA7	MS.gene89646.t1	GmMsrB3	Glyma.15G100700	AtGMsrB2	At4g21860	MtMsrB3	Medtr2g020950.1
MsMsrA8	MS.gene022411.t1	GmMsrB4	Glyma.13G212000	AtGMsrB3	At4g04800	MtMsrB4	Medtr4g092800.1
MsMsrA9	MS.gene78714.t1	GmMsrB5	Glyma.13G253800	AtGMsrB4	At4g04810.	MtMsrB5	Medtr2g020930.1
MsMsrB1	MS.gene032356.t1			AtGMsrB5	At4g04830
MsMsrB2	MS.gene38969.t1			AtGMsrB6	At4g04840
MsMsrB3	MS.gene007821.t1			AtGMsrB7	At4g21830
MsMsrB4	MS.gene002820.t1			AtGMsrB8	At4g21840
MsMsrB5	MS.gene40100.t1			AtGMsrB9	At4g21850
MsMsrB6	MS.gene053626.t1

## Sheet: Sheet2
Table S2. Motif sequence of MsMsr protein
Motif1	CTBAVATTCTTCMWSCCDARARRTTYTAHAVDGCWSAGGANTADCAHCAG
Motif2	TGKGGNKBGGARGYYGTCTTYVAGNGTKTDSCTGGRGTKRKSAASACMRA
Motif3	GHCARGGVVVTGATGTGGGWRMWCARTAYAGATCWRKWATWTWYKWYWAY
Motif4	SGTKGAGKHTTRGKHYTCVAVYANTCTSCWGHRAARGGMTGCAAWGATCC
Motif5	WKTRSYTTTGRGRAWCTRCTTGATATRTTYTGGTCRARMCATGATCCYAS
Motif6	GGTKGGWTATWCMSRKGGDYHTWHRCMBRATCCTRAHTAY
Motif7	AGCHCAAGAVTCAWDRGAASMWMAASAGWWGVAAYHTRRSRRSAAGATTG
Motif8	CAHCYTCAKYDVAHTCATCTWCCRVRWTDHMHRSTGKATCCGRHTSCCGR
Motif9	KBMKMMRAVWRMWGGMVMAAACSAGRWCHASAAGCHRSATT

## Sheet: Sheet3
Table S3. The sequences of the MsMSR and their Uniprot accession
Gene Name	UniProtKB Entry	Protein sequence
MsMsrA1	B7FJB1	MRICGAAASSAYSTTSSSLLVFVSSSFSTPAKTKFLPSLSRFSVKRPCLFSPTRPHFTVTKPSMNLLNKLGFGSARSSESMDSTIPQGPDDDIPAPGQQFAAFGAGCFWGVELVFQRVPGVSKTEVGYTQGLLHNPTYEDVCSGTTNHNEVVRVQYDPKQCAFENLLDTFWSKHDPTTPNRQGNDVGTQYRSGIYFYTPEQEKIAKESLEQQEKQLGRKIATEILPAKKFYRAEEYHQQYLEKGGRFGFKQSAAKGCNDPIRCYG
MsMsrA2	G7IXM5	MYLLNRLWFGSTRATEKMDSSIAQGPDDNTPALDQQFAQFGAGCFWSVELAFQRVAGVTKTEVGYSQGLLHNPRYQDVCSGTTRHSEVVRVQYDPNECSYETLLDVFWAKHDPTTLNRQGNDVGTQYRSGIYYYTPEQEKAARESLEQQQKKLNRKIVTEILPAKKFYRAEEYHQQYLEKGGRFGRKQSSSKGCNDPIRCYG
MsMsrA3	G8A2F8	MATSEGGNGNHNPAFDPDSDIPDNPDNEFAEFGAGCFWGVELAFQRIVGVVKTEVGYTQGHTPDPNYKLVCTGTTNHVEVVRVQFDPKLCPYTNLLDLFWSRHDPTTLNRQGGDVGAQYRSGIYYYNETHSRLAQESKEAKQLEHKDKIVTEILPAKRFYRAEEYHQQYLEKGGGKGLGQSAEKGCNDPIRCYG
MsMsrA4	B7FJB1	MRICGAAASSAYSTTSSSLLVFVSSSFSTPAKTKFLPSLSRFSVKRPCLFSPTRPHFTVTKPSMNLLNKLGFGSARSSESMDSTIPQGPDDDIPAPGQQFAAFGAGCFWGVELVFQRVPGVSNTEVGYTQGLLHNPTYEDVCSGTTNHNEVVRVQYDPKQCAFENLLDTFWSKHDPTTPNRQLSNCDIWIFVCDGNDVGTQYRSGIYFYTPEQEKIAKESLEQQEKQLGRKIATEILPAKKFYMAEEYHQQYLEKGGRFGFKQSAAKGCNDPIRCYG
MsMsrA5	G7LCY5	MIHNDYCKTNYNYILYTFIIFVAFIFNNANCIRFPDRVAQPAREQPDQQRLQTAVFALGSFWRSEAVFGCLPGVVRTTVGYSGGSKPNPEYRSFGDHAESVQVEYDPRLISFGELLDIFWSSHDPRQVFGQGPDVGNQYRSIIFVNGTEESRMASVSKEQEQTRSRSSIVTTQILQLGTFHPAEPEHQKFELKQNTFLLQLIGNLPEEELERSNLATKLNGYVAELCPPNIQKQIDAKINEILKKGWPILREL
MsMsrA6	A0A072TSD3	MVATVGAKMGSGSLLGKLCSIKSDKKTNYNYILSTFIIFIAFIFDNANCIRFPDRVAQPAREQPDQQRLQTAVFALGSFWRSEAVFGCLPGVVRTTVGYSGGSKPNPEYRSFGDHAESVQVEYDPRLISFGELLDIFWSSHDPRQVFGQGPDVGNQYRSIIFVNGTEESRMASVSKEQEQTRSRSSIVTTQILQLGTFHPAEPEHQV
MsMsrA7	G7LCY5	MMETVGARMGSEKTNYNYILYTFIIFIAFIFNNANCIRFPDRIAKPAREQPDQQRLQTAVFALGSFWRSEAVFGCLPGVVRTTVGYSGGSKPNPEYRSFGDHAESVQVEYDPRLISFGELLDIFWSSHDPRQVFGQGPDVGNQYRSIIFVNGTEESRMASVSKEQEQTRSRSSIVTTQILQLGTFHPAEPEHQLIGNLPEEELERSNLATKLNGYVAELCPPNIQKQIDAKINEILKKGSRRKASWKDPEGYIIKNTTRESAVAILTSMKEDILSGKAKFEDLASRYSDCSSAKRGGDLGPFGRGQMQKPFEDATYALQVGEISDIVDSDSGSHIIKRTN
MsMsrA8	A0A2Z6N2S9	MATSEGGNGNHNPAFDPDLDTPDNPDHEFAEFGAGCFWGVELAFQRIVGVVKTEVGYTQGHTPDPNYKLVCTGTTNHVEVVRGGDVGAQYRSGIYYYNETQARLAQESKEAKQLEHKDKIVTEILPAKRFYRAEEYHQQYLEKGGGKGLGQSAEKGCNDPIRCYG
MsMsrA9	A0A2Z6N2S9	MATSEGGNGNHNPAFDPDLDTPDNPDHEFAEFGAGCFWGVELAFQRIVGVVKTEVGYTQGHTPDPNYKLGGDVGAQYRSGIYYYNETQARLAQESKEAKQLEHKDKIVTEILPAKRFYRAEEYHQQYLEKGGGKGLGQSAEKGCNDPIRCYG
MsMsrB1	I3SN78	MDLKSCMLVIRLVERDIAQFYVKACSRLQTGVELIGGWCLCFAGSSSVDYKSLSDEEWKKQLTDEQFYVTRKKGTERAFTGEYWNTKTEGTYHCICCDTPLFESSTKFNSGTGWPSYYQPIGKNVKSKLDLSIIFMPRQEVLCAVCDAHLGHIFDDGPPPTGKRYCINSASLKLKPRK
MsMsrB2	I3SN78	MASHSSSLSAAAQILTNTQIHKFDSKLFLWPSRLQLHTKPTTKLSSSIRAMGSSASSNSNNSNTTEIQSGSSSVDYKSLSDEEWKKQLTDEQFYVTRKKGTERAFTGEYWNTKTEGTYHCICCDTPLFESSTKFNSGTGWPSYYQPIGKNVKSKLDLSIIFIPRQEVLCAVCDAHLGHIFDDGPPPTGKRYCINSASLKLKPRK
MsMsrB3	I3SN78	MDLKSCMLVIRLVERDIAQCYVKVCSCLQTGVELTGSSPVDYKSLSDEEWKKQLTDEQFYVTRKKGTESAFTGEYWNTKTEGTYHCICCDTPLFESSTKFNSGTGWPSYYQPIGKNVKSKLDLSIIFMPRQEVLCAVCDAHLGHIFDDGPPPTGKRYCIK
MsMsrB4	G7IFP1	MASTASSIEKSEEEWRAILSPEQFHILRQKGTELKGTGEYNKFFEEGIYNCAGCGTPLYKSSTKFDSGCGWPAFFEGFPGAINRSPDPDGRRTEITCAACGGHLGHVFKGEGFKVPTDERHCVNSVSVKFIPGNATSSI
MsMsrB5	G7JU02	MTVNILRITPLSSLNVTKPISSICSNPTFLFNSKFTFTPPNSLPTISIRQPKRGFRGGIVAMSAAPTPGSVQKSEEEWQAILSPEQFRILRQKGTEYPGTGEYDKFFGEGVYSCAGCGTPLYKSTTKFNSGCGWPAFYEGVPGAINRHPDPDGMRIEITCAACGGHLGHVFKGEGFPTPTNERHCVNSISLKFAPANS
MsMsrB6	G7JU01	MTVNILRITPLSSLNVTKPISSICSNPTFLFNSKFTFTSPNSLPTISIRQPKRGFRGGIVAMSAAPTPGSVQKSEEEWQAILSPEQFRILRQKGTEYPGTGEYDKFFGEGVYSCAGCGTPLYKSTTKFNSGCGWPAFYEGVPGAINRHGYDLTKQKSPGYSRAVSRVHTSSMFTHYSVDKHILFQCQSTAASEKFTRRRPLDAPSFSGWNLSYFSKHRPLRWDRLQTNVSYDVASAVEVINDLGLDTLTFLAVTVFIVPSFKLIKASPILGFFCAGVVLNQFGLIRNLEDVKVLSEWGILFLLFEMGLELSLARLKALAKYAFGMGLTQVLLSTLAFTAFELPPNGAVGTKILEFLFHSRSDLVNIRSVDEAVVIGAALSLSSSAFVLQLLAEKGELPT…

## Sheet: Sheet4
Table S4. Duplication events of MsMsr genes
Segment pairs	Ka/Ks
MsrA8&MsrA3	0.758736
MsrA2&MsrA4	0.192605
MsrB5&MsrB6	0.588722
MsrB3&MsrB1	0.173542
MsrB3&MsrB2	0.724598
MsrA6&MsrA5	1.97314
MsrB1&MsrB2	0.712435

## Sheet: Sheet5
Table S5. The MsMSR genes promoter elements information
Gene Name	wound-response element	anaerobic induction	MeJA-responsiveness	defense and stress responsiveness	ethylene-responsiveness	salicylic acid responsiveness	abscisic acid responsiveness	gibberellin-responsiveness	low-temp and salt stresses	flavonoid biosynthetic genes regulation	low-temperature responsiveness	Damage and Defense Response elements	auxin responsiveness	proliferation-activating response	drought-inducibility
MsMsrA1	1	3	8	1	1	2	2	1	0	0	0	0	0	0	0
MsMsrA2	0	3	2	3	1	2	1	2	1	0	0	0	0	0	0
MsMsrA3	1	2	2	0	2	2	8	1	0	1	1	1	0	0	1
MsMsrA4	1	1	8	1	1	2	5	1	0	0	0	0	0	0	0
MsMsrA5	0	1	2	6	0	0	8	0	0	0	0	2	1	1	1
MsMsrA6	0	2	2	7	0	0	8	0	0	0	0	2	0	1	1
MsMsrA7	1	2	4	4	1	1	11	0	0	0	0	0	0	0	1
MsMsrA8	0	3	0	1	0	4	0	0	0	0	1	0	0	0	2
MsMsrA9	0	3	0	1	0	4	0	0	0	0	1	0	0	0	2
MsMsrB1	0	1	0	3	2	1	7	3	0	0	1	0	0	0	0
MsMsrB2	0	3	6	1	3	2	8	0	0	0	2	0	1	0	0
MsMsrB3	0	3	0	4	2	2	7	3	0	0	0	0	0	0	0
MsMsrB4	0	1	4	6	1	1	5	2	0	0	1	1	1	1	1
MsMsrB5	1	2	4	0	1	0	1	1	0	0	1	0	1	0	0
MsMsrB6	1	3	2	4	1	1	2	0	0	0	1	1	1	0	0
Name of element	Description of element
WUN-motif	wound-response element
ARE	anaerobic induction
CGTCA-motif	MeJA-responsiveness
TC-rich repeats	defense and stress responsiveness
ERE	ethylene-responsiveness
TGACG-motif	MeJA-responsiveness
TCA	salicylic acid responsiveness
ABRE	abscisic acid responsiveness
P-box	gibberellin-responsiveness
STRE	defense and stress responsiveness
W-box	defense and stress responsiveness
DRE core	low-temp and salt stresses
MBSI	flavonoid biosynthetic genes’ regulation
LTR	low-temperature responsiveness
TATC-box	gibberellin-responsiveness
WRE3	Damage and Defense Response elements
TGA	auxin responsiveness
CCGTCC-box	proliferation-activating response
MBS	drought-inducibility
GARE-motif	gibberellin-responsiveness
AuxRR-core	auxin responsiveness

## Sheet: Sheet6
Table S6. The sequences of primers used in qRT-PCR
Gene Name	Forward primer sequence (5′ → 3′)	Reverse primer sequence (5′ → 3′)	The size of the amplicon
MsMsrA1	CCAGCACCAGGTCAGCAGTT	GGCACATTGTTTGGGATCATAT	207bp
MsMsrA2	TAGCACAAGGGCAACAGAA	AGGCCAACTCGACACTCC	125bp
MsMsrA3	AGCTTTTGACCCGGATTCG	CCAAAAGAGATCCAAGAGATTTGT	262bp
MsMsrA4	CACAGAGGTTGGTTACACCCAG	TGTTCCCACATCATTCCCGT	232bp
MsMsrA5	GAGCACCAGAAATTTGAACTCAA	TTACAGTTCCCTTAAAATCGGC	406bp
MsMsrA6	TTGGTCAAGCCATGATCCC	TCAAACCTGGTGCTCAGGCT	214bp
MsMsrA7	CGTGAAAGTGCCGTTGCTAT	GGGATCCACTGTCACTATCCAC	226bp
MsMsrA8	GGTGCGGGTTGTTTCTGG	ACCCACATCACCTCCCCG	165bp
MsMsrA9	AAACTGGGAGGTGACGTG	TTCTTTTGATTCTTGGGC	90bp
MsMsrB1	GATGGTGTCTGTGCTTTGCAG	CAAATAAGGGTGTGTCACAGCA	156bp
MsMsrB2	GCAATGGGTTCTTCAGC	AATGGTAAGTCCCTTCAGTT	211bp
MsMsrB3	CAGGATCTAGTCCTGTTGATTA	CAGTTTTGGTATTCCAGTACTC	138bp
MsMsrB4	TGGCATCAACAGCATCATC	GAGTTCCACATCCAGCACA	168bp
MsMsrB5	AACACCTCTTTCTTCCCTCAAC	CTTCGGCTGACGAATGGAGA	133bp
MsMsrB6	TTCACCTTCACTTCACCCA	TGTAGACTCCCTCCCCAAA	235bp

## Sheet: Sheet7
Table S7. Expression of MsMSR genes in roots, stems and leaves under salt stress
	Root								Stem								Leaf
Gene Name	0h	3h	6h	12h	24h	6d		Gene Name	0h	3h	6h	12h	24h	6d		Gene Name	0h	3h	6h	12h	24h	6d
MsMSRA1	38.6722	79.2234	109.115	44.4972	35.7401	103.474		MsMSRA1	58.8259	66.4283	56.6512	84.0082	46.6772	135.277		MsMSRA1	165.991	136.462	85.6081	84.0082	46.6772	135.277
MsMSRA2	25.6309	100.638	101.596	80.0139	14.403	94.6006		MsMSRA2	11.5309	27.3255	13.1664	20.153	5.56521	168.375		MsMSRA2	20.341	58.2093	33.456	39.9585	5.04654	36.938
MsMSRA3	5.00588	4.1477	5.88284	5.88284	10.6912	17.8094		MsMSRA3	2.04589	1.49624	5.7475	5.7475	3.9095	3.96333		MsMSRA3	3.73974	0.871888	4.02993	4.02993	2.72078	5.60543
MsMSRA4	24.6537	95.8563	102.182	92.464	40.382	157.544		MsMSRA4	30.894	70.2264	47.9973	90.3313	52.2869	156.507		MsMSRA4	117.114	159.712	57.1578	86.1077	100.011	178.114
MsMSRA5	70.3603	46.5919	9.79904	30.8623	119.573	63.5146		MsMSRA5	58.7809	21.3587	44.4678	50.0288	82.4316	79.1974		MsMSRA5	47.3478	10.4575	17.1854	7.59499	90.9265	67.4502
MsMSRA6	15.3422	16.7157	13.3278	15.6482	14.9675	18.5848		MsMSRA6	17.7125	18.7033	19.4435	18.6015	17.0642	25.3605		MsMSRA6	16.7544	16.5405	6.28684	3.68908	15.1983	13.6312
MsMSRA7	1.00731	23.2712	252.498	316.277	51.6344	618.582		MsMSRA7	5.69183	19.4474	8.57109	9.66961	175.322	231.551		MsMSRA7	28.2342	128.652	31.5186	35.9951	75.0831	101.738
MsMSRA8	66.4309	31.5382	17.8257	53.3993	20.3524	46.1478		MsMSRA8	33.0833	17.9965	6.46692	8.25636	11.6995	23.0926		MsMSRA8	41.9755	9.24432	4.8368	7.14244	6.63798	21.0064
MsMSRA9	8.27173	5.22845	2.60343	1.19429	4.38136	10.4845		MsMSRA9	7.20699	8.2244	2.08351	0.460434	3.58471	3.94953		MsMSRA9	4.87636	4.53354	0.975001	0.544849	3.17465	2.84111
MsMSRB1	5.01374	11.1434	29.4927	80.575	7.99352	94.5679		MsMSRB1	11.3346	10.1908	5.3797	6.87009	58.9251	14.3861		MsMSRB1	29.8265	55.1612	17.0107	19.2932	12.9548	18.5104
MsMSRB2	7.63885	52.9933	29.7485	11.7713	7.48391	11.9033		MsMSRB2	30.1518	44.9166	37.339	25.5811	21.2049	59.1561		MsMSRB2	156.753	114.266	46.2922	25.3876	105.549	91.9071
MsMSRB3	3.90157	33.7513	26.4788	12.3853	9.09027	30.0138		MsMSRB3	32.7365	33.5857	43.6722	27.5134	27.4651	87.4418		MsMSRB3	96.8589	51.7827	62.1168	21.2779	136.173	132.098
MsMSRB4	27.1568	35.3364	10.783	7.24628	13.0524	27.166		MsMSRB4	10.2106	10.0196	4.32345	6.18277	6.98214	32.5819		MsMSRB4	9.4613	10.5713	6.30137	3.96918	6.69241	44.076
MsMSRB5	111.203	60.8543	144.386	109.446	235.452	188.368		MsMSRB5	186.649	62.9038	89.782	81.282	392.984	384.892		MsMSRB5	117.412	47.1712	110.777	77.0684	491.648	720.716
MsMSRB6	45.2871	77.4637	28.3147	14.7284	43.8723	44.336		MsMSRB6	53.0576	53.996	26.8282	15.5918	60.6901	96.6874		MsMSRB6	120.602	56.659	23.6216	11.206	140.141	80.5406

## Sheet: Sheet8
Table S8. Expression of MsMSR genes in roots,stems and leaves under drought stress
Root									Stem									Leaf
Gene Name	0h	3h	6h	12h	24h	48h			Gene Name	0h	3h	6h	12h	24h	48h			Gene Name	0h	3h	6h	12h	24h	48h
MsMsrA1	1	4.52422	6.91906	5.26155	8.91202	1.32515			MsMsrA1	1	1.59539	2.82317	2.97001	9.3872	1.89857			MsMsrA1	1	1.68437	2.58103	6.60811	7.89106	9.67207
MsMsrA2	1	1.59754	8.52963	7.84578	5.07052	1.37668			MsMsrA2	1	1.51228	26.2056	6.2958	7.85113	1.16852			MsMsrA2	1	2.67302	9.8477	24.5928	15.1073	62.7329
MsMsrA3	1	0.392995	0.446858	0.372181	2.28462	0.385659			MsMsrA3	1	0.717972	0.561914	0.342045	5.30233	1.03075			MsMsrA3	1	0.605578	0.309551	0.29574	1.25501	5.81758
MsMsrA4	1	4.50936	7.24511	5.40874	6.51446	0.713924			MsMsrA4	1	1.94876	4.19517	3.29136	7.11745	2.21042			MsMsrA4	1	2.91354	3.70157	6.22986	7.36964	12.1369
MsMsrA5	1	0.793926	1.00554	1.29654	0.975241	0.292309			MsMsrA5	1	1.75013	2.46735	4.24408	1.42978	0.66557			MsMsrA5	1	1.08238	1.83333	5.22325	1.81016	6.7676
MsMsrA6	1	1.33041	1.83941	2.07185	1.01065	0.915718			MsMsrA6	1	1.75417	2.76097	2.99001	1.1724	0.80401			MsMsrA6	1	2.97226	3.11702	7.40812	2.50998	9.85878
MsMsrA7	1	0.551407	0.449582	0.548036	0.443307	0.162069			MsMsrA7	1	0.552282	0.77501	0.533408	0.647368	0.227846			MsMsrA7	1	1.54102	2.47842	4.69171	3.64051	6.61771
MsMsrA8	1	0.76148	2.44693	2.47548	3.91148	0.731909			MsMsrA8	1	1.38133	1.96948	1.16314	8.46709	2.21478			MsMsrA8	1	0.860472	0.975089	0.684306	1.97846	13.5299
MsMsrA9	1	2.85293	1.1842	4.31452	3.63542	1.03017			MsMsrA9	1	0.130624	0.373136	1.23591	4.08263	0.659805			MsMsrA9	1	0.0412233	0.240245	0.720355	0.280045	3.00034
MsMsrB1	1	14.4381	43.3241	42.0632	55.2641	8.45402			MsMsrB1	1	2.18067	6.64643	4.67944	8.39262	3.50607			MsMsrB1	1	6.56413	6.53579	18.7865	14.2686	16.2235
MsMsrB2	1	4.49475	5.27002	4.29817	6.13932	2.02902			MsMsrB2	1	1.91067	2.27325	2.8406	2.59055	1.70328			MsMsrB2	1	1.96037	1.89221	4.39536	3.13169	4.76576
MsMsrB3	1	7.8174	8.257	0.685761	4.02338	1.46687			MsMsrB3	1	2.18115	3.82567	0.515677	2.22567	1.3562			MsMsrB3	1	2.74484	3.25515	0.795108	1.88077	4.81943
MsMsrB4	1	0.226493	0.373445	1.96583	1.06607	0.315617			MsMsrB4	1	1.30035	1.01202	4.86566	2.90634	1.18893			MsMsrB4	1	1.45802	0.988481	8.5695	1.31789	8.41819
MsMsrB5	1	0.985708	1.90237	1.76501	2.65484	1.06191			MsMsrB5	1	1.11175	2.17831	1.80987	2.9976	2.00206			MsMsrB5	1	1.34663	2.12791	2.11129	2.36756	3.65587
MsMsrB6	1	0.875404	1.23108	1.0375	1.12898	0.893541			MsMsrB6	1	0.452149	1.40372	1.18125	1.32239	1.55611			MsMsrB6	1	0.547367	1.3809	1.22932	1.38171	5.81251

## Sheet: Sheet9
Table S9. Expression of MsMSR genes in roots,stems and leaves under ABA stress
Root								Stem								Leaf
Gene Name	0h	3h	6h	12h	24h			Gene Name	0h	3h	6h	12h	24h			Gene Name	0h	3h	6h	12h	24h
MsMsrA1	1	4.57215	3.25053	1.4628	3.00082			MsMsrA1	1	1.83477	1.21635	1.02951	1.51355			MsMsrA1	1	4.54211	2.0372	0.950864	2.26595
MsMsrA2	1	2.3643	1.25672	0.841325	0.86851			MsMsrA2	1	0.867321	1.03536	0.672093	0.552771			MsMsrA2	1	3.40107	2.07463	1.26491	1.49502
MsMsrA3	1	0.459853	0.833182	0.315315	0.857178			MsMsrA3	1	0.294604	0.473931	0.797847	0.972999			MsMsrA3	1	1.35262	0.591356	0.380464	1.51893
MsMsrA4	1	3.19894	2.66238	0.856295	2.11431			MsMsrA4	1	1.44974	0.989914	0.691929	1.2881			MsMsrA4	1	3.46877	2.20172	0.764599	2.04499
MsMsrA5	1	1.76891	1.0843	1.01093	0.90001			MsMsrA5	1	2.63743	1.73621	2.46718	1.21622			MsMsrA5	1	4.3274	2.76875	1.75078	1.24945
MsMsrA6	1	2.47288	1.49768	0.954095	1.29679			MsMsrA6	1	2.25323	1.43694	2.15546	1.07953			MsMsrA6	1	6.51703	4.10129	2.48273	1.40012
MsMsrA7	1	0.820874	0.650155	0.32046	0.351222			MsMsrA7	1	0.892644	0.71496	0.592807	0.274048			MsMsrA7	1	3.69426	3.54634	1.39613	0.68597
MsMsrA8	1	1.07404	2.10464	1.6894	1.49298			MsMsrA8	1	0.544861	1.07869	0.813083	1.48785			MsMsrA8	1	1.62422	1.29892	0.496195	2.03505
MsMsrA9	1	1.36292	8.03047	4.41919	0.55346			MsMsrA9	1	0.558642	2.15561	4.89949	0.0972109			MsMsrA9	1	3.31713	2.62083	0.725829	0.0759813
MsMsrB1	1	559.393	82.8047	212.2	243.653			MsMsrB1	1	1.21572	15.4908	27.8509	35.2193			MsMsrB1	1	2.59657	80.8563	31.5618	77.246
MsMsrB2	1	107.638	59.7514	23.2736	55.1188			MsMsrB2	1	32.045	19.8114	22.8162	31.6645			MsMsrB2	1	119.031	85.7938	21.9942	27.2582
MsMsrB3	1	109.698	98.8052	41.5391	69.905			MsMsrB3	1	36.117	42.2063	26.6642	37.0182			MsMsrB3	1	132.078	136.223	31.9477	30.2702
MsMsrB4	1	0.658384	0.275973	0.378282	0.188539			MsMsrB4	1	0.410942	0.170005	0.859887	0.663297			MsMsrB4	1	1.02362	0.307296	0.326637	0.464627
MsMsrB5	1	1.30437	1.36046	1.17387	0.968358			MsMsrB5	1	0.858565	0.891236	0.838952	1.0817			MsMsrB5	1	1.49165	1.57204	0.581023	0.75032
MsMsrB6	1	0.709563	1.48563	0.354378	0.453045			MsMsrB6	1	0.390112	0.95039	0.47658	0.544409			MsMsrB6	1	0.69851	2.01668	0.346229	0.539257
